# Supplementary material for: Revisiting thin silicon for photovoltaics: a technoeconomic perspective
Source: Royal Society of Chemistry journal article supplement (doi:10.1039/c9ee02452b), 2019-10-25
Supplement: c9ee02452b2.xlsx [file c9ee02452b2.xlsx]

## Sheet: Cost and Capex
	Reference Cell and Module Inputs				Manuacturing Cost of PERC Si Module				Factory PPE Capex for PERC Si Module
	Wafer thickness	160	um		Cz Growth and Wafering	$/m2	$/W		Poly Si	$/m2	$/W
	Kerf loss per wafer	95	um		Czochralski Ingot Formation	10.9417	0.0575879		TCS Production	7.61054	0.0400555
	PERC efficiency	19	%		Ingot Cropping, Squaring, Grinding, and Gluing to Glass	0.77463	0.004077		Pull Filament	0.269919	0.00142063
					Diamond Wire Wafer Slicing	5.70722	0.030038		Anneal & Saw Filament	0.0821492	0.000432364
					Wafer Cleaning, Singulation, and Metrology	1.62179	0.00853575		Machine & Etch Filament	0.0938848	0.000494131
					Sub-Total	19.0454	0.100239		Siemens CVD	9.69361	0.051019
									Harvest Chunk, Package	1.32026	0.00694871
									Sub-Total	19.0704	0.10037
					Cell Conversion	$/m2	$/W
					Receiving Department. Wafer Unloading and Inspection.	0.444062	0.00233717		Cz Growth and Wafering	$/m2	$/W
					Wet Chemical Saw Damage Removal and Surface Texturization	2.48483	0.013078		Czochralski Growth	14.9303	0.0785806
					POCl3 Diffusion in Tube Furnace	0.752017	0.00395798		Brick Preparation	1.04806	0.00551613
					Edge Isolation and Phosphosilicate Glass (PSG) Layer Removal	0.428261	0.00225401		Wire Sawing	1.77619	0.00934839
					PECVD of AlOx layer	1.2092	0.00636421		Inspect and Sort, Package	1.91961	0.0101032
					PECVD of Backside SiNx and Frontside SiNx Anti Reflection Coating	2.16207	0.0113793		Sub-Total	19.6742	0.103548
					Laser contact opening of dielectric layer stack on cell backside	0.256241	0.00134864
					Screen Print Ag and Al Pastes	3.51698	0.0185104		Cell Conversion	$/m2	$/W
					Cofire Pastes	0.238233	0.00125386		Wafer Testing	1.9	0.01
					Inspection, I-V Testing, and Sorting of Cells. Package for Shipping in Cartridges and Boxes.	0.485118	0.00255325		Texture & Damage Etch	4.826	0.0254
					Sub-Total	11.977	0.0630369		Emitter Diffusion	2.28	0.012
									PSG Removal & Edge Isolate	0.76	0.004
									PECVD of SiNx:H	3.61	0.019
									PECVD of SiNx:H and/or AlOx (backside)	3.8	0.02
					Module Assembly	$/m2	$/W		Laser contact opening (wafer baackside)	0.76	0.004
					Automated Glass Loading and Laydown of First EVA Sheet	5.79418	0.0304957		Screen Print	2.09	0.011
					Automated Cell Loading, Tabbing, Stringing, and Contactless IR Soldering to Front and Back Silver on Cells	2.06581	0.0108727		Co-fire	0.76	0.004
					Automated Placement of Cell Strings. Manual Solder of Connector Ribbons and Laydown of EVA and Backsheet.	5.08831	0.0267806		Inspect, Sort, Package	2.09	0.011
					Visual Inspection and Electroluminescence Testing. Module Lamination.	1.81147	0.00953403		Sub-Total	22.876	0.1204
					Automated Module Edge Trimming. Aluminum Frame and Silicone Sealant.	4.82745	0.0254076
					Solder string connector leads in J-Box and Fill with Potting Agent. Sticker Placement and Module Curing.	3.59827	0.0189383		Module Assembly	$/m2	$/W
					I-V Module Test and EL Inspection. Module Sorting and Palletizing. Warehouse CapEx and OpEx.	0.412743	0.00217233		Cell Testing	1.33	0.007
					Sub-Total	23.5982	0.124201		String, Tab, and Interconnect	3.23	0.017
									Front Glass Load & Wash	0.57	0.003
					SG&A +R&D	7.10068	0.037372		Encapsulate & Laminate	3.04	0.016
									Frame and Seal	1.14	0.006
									J-Box and Potting	1.14	0.006
					Total Cost	61.7213	0.324849		Test, Sort, Package	1.71	0.009
									Sub-Total	12.16	0.064
									Total Capex	73.7806	0.388319

## Sheet: Utility LCOE
Simple solar LCOE calculator
System Inputs	Values	Input Description		Year	Production (kWh)	NPV of electricity (kWh)	Direct Purchase Cost ($)	O&M Cost ($)	Levelized total cost ($)	Include this year?
System Size (kW-DC)	114600	Varying with module efficiency (fixed area)		0		0	1.15204e+08		1.15204e+08
System Area (m^2)	600000			1	1.79597e+08	1.69431e+08		1489800	1.40547e+06	1
Module Efficiency (%)	19.1	Mono-PERC 2018		2	1.78703e+08	1.59045e+08		1489800	1.32592e+06	1
Normalized energy yield (kWh/year/kW-DC)	1575	Fixed tilt in Kansas CIty MO (incl. 90% performance ratio)		3	1.77814e+08	1.49296e+08		1489800	1.25086e+06	1
Annual Degradation (/year)	0.005			4	1.7693e+08	1.40145e+08		1489800	1.18006e+06	1
System Lifetime (year)	30			5	1.7605e+08	1.31554e+08		1489800	1.11327e+06	1
				6	1.75174e+08	1.23491e+08		1489800	1.05025e+06	1
				7	1.74302e+08	1.15921e+08		1489800	990802	1
				8	1.73435e+08	1.08815e+08		1489800	934719	1
Financial Inputs				9	1.72572e+08	1.02145e+08		1489800	881810	1
Module price [$/W-DC]	0.378824	assume 15% operting margin on top of module cost		10	1.71714e+08	9.58839e+07		1489800	831897	1
Module price mark-up [-]	0.23	supply chain, profit, and sales tax		11	1.70859e+08	9.00065e+07		1489800	784808	1
Project fixed cost [$]	9450000			12	1.70009e+08	8.44894e+07		1489800	740385	1
Area-dependent cost [$/m^2]	75.8			13	1.69163e+08	7.93104e+07		1489800	698476	1
Power-dependent cost [$/W-DC]	0.06			14	1.68322e+08	7.44489e+07		1489800	658940	1
Additional system mark-up [-]	0			15	1.67484e+08	6.98854e+07		1489800	621641	1
Total system costs ($/kW-DC)	1005.27			16	1.66651e+08	6.56016e+07		1489800	586454	1
Discount rate / IRR (-)	0.06			17	1.65822e+08	6.15804e+07		1489800	553259	1
O&M Cost ($/kW-yr)	13			18	1.64997e+08	5.78057e+07		1489800	521942	1
				19	1.64176e+08	5.42623e+07		1489800	492398	1
				20	1.63359e+08	5.09362e+07		1489800	464527	1
Output				21	1.62547e+08	4.7814e+07		1489800	438233	1
U.S. Utility LCOE (cents/kWh)	5.77564			22	1.61738e+08	4.48831e+07		1489800	413427	1
				23	1.60933e+08	4.21319e+07		1489800	390026	1
				24	1.60133e+08	3.95493e+07		1489800	367949	1
				25	1.59336e+08	3.7125e+07		1489800	347121	1
				26	1.58543e+08	3.48494e+07		1489800	327473	1
				27	1.57754e+08	3.27132e+07		1489800	308937	1
				28	1.5697e+08	3.0708e+07		1489800	291450	1
				29	1.56189e+08	2.88257e+07		1489800	274953	1
				30	1.55412e+08	2.70587e+07		1489800	259389	1
				31	0	0		0	0	0
				32	0	0		0	0	0
				33	0	0		0	0	0
				34	0	0		0	0	0
				35	0	0		0	0	0
				Total	5.01669e+09	2.34971e+09	1.15204e+08	44694000	1.35711e+08
